# Supplementary material for: NEDD4 controls spermatogonial stem cell homeostasis and stress response by regulating messenger ribonucleoprotein complexes
Source: PubMed Central journal article supplement (PMC5494183; doi:10.1038/ncomms15662), 2017-06-06
Supplement: ncomms15662-s1.pdf [file ncomms15662-s1.pdf]

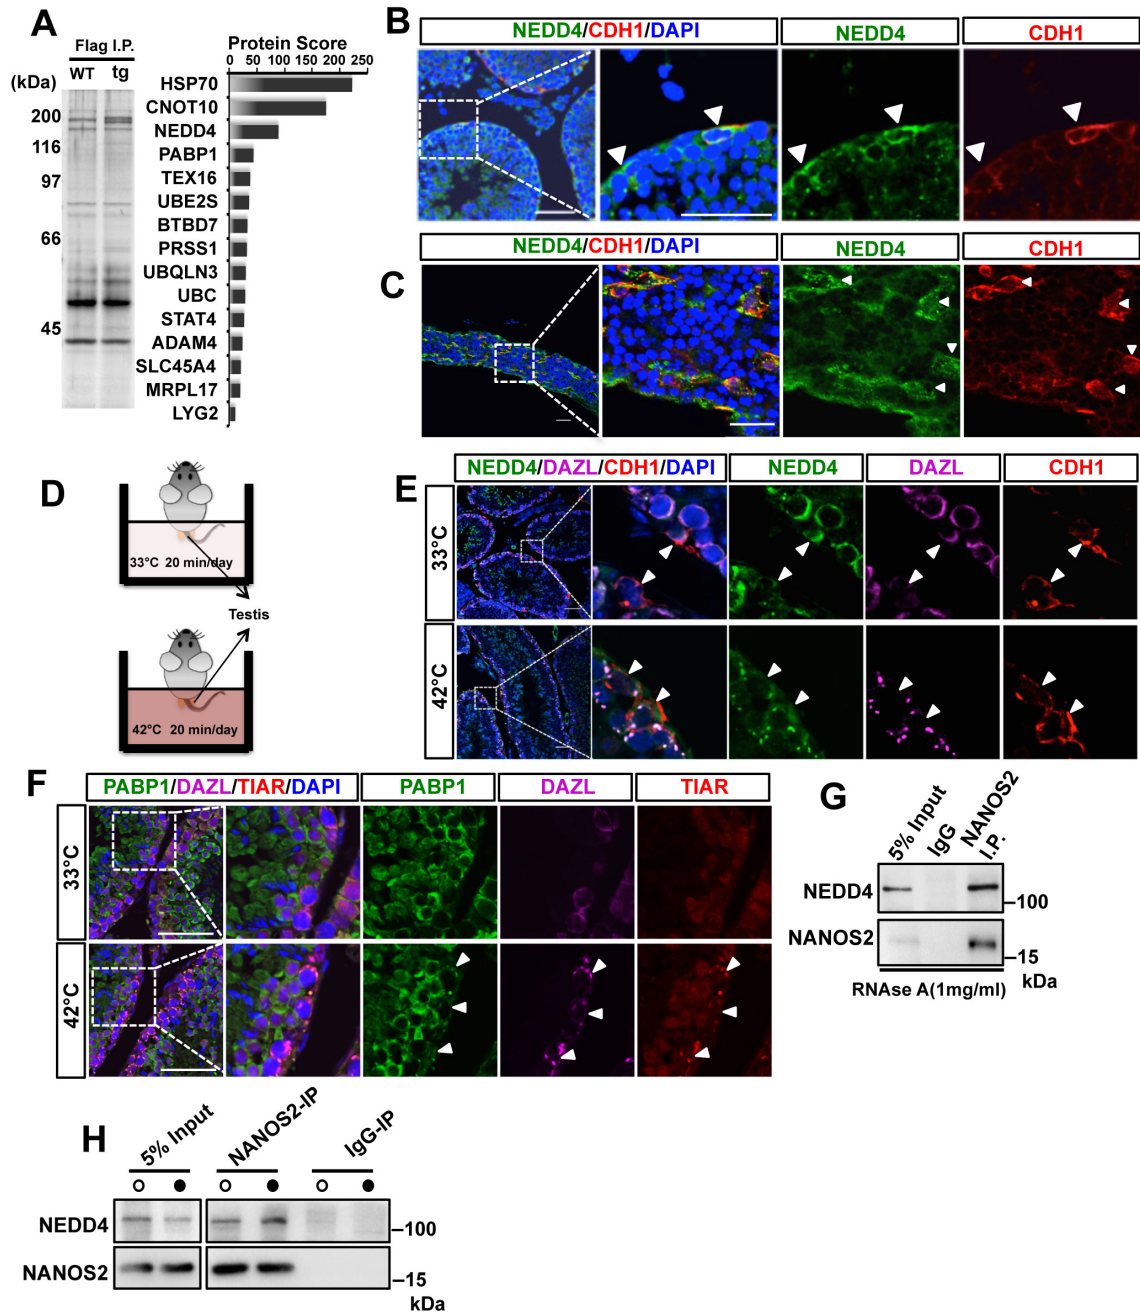

**Supplementary figure 1. Heat stress induces SGs in spermatogonia. Related to Figure 1.**

(A) NANOS2 interacting proteins were identified by mass spectrometry/mass spectrometry (MS/MS) in male gonads. Positive control of NANOS2 interacting proteins, such as CNOT1<sup>1,2</sup> and PABP1<sup>3</sup>, were identified. Another NANOS2 binding candidate NEDD4 was identified. Tg indicates a mouse line that expresses Flag-tagged NANOS2 under the control of the *Nanos2* enhancer<sup>1,2</sup>.

(B-C) Representative staining patterns of sections (B) and whole mount (C) of WT (wild-type) adult testes (12 weeks) are shown. Immunostaining was performed with anti-NEDD4 and anti-CDH1 antibody. Enriched NEDD4 was observed in CDH1<sup>+</sup> SPCs. Scale bars = 50µm.

(D) Illustration shows the method of the heat shock treatment for testis *in vivo*.

(E, F) Representative staining patterns of heat shock-treated testes. Frozen sections were stained for NEDD4, DAZL and CDH1. Heat shock-induced changes in the subcellular distribution of DAZL and NEDD4 in CDH1<sup>+</sup> SPCs (E). PABP1 was also recruited to SGs (marked by DAZL and TIAR) in cells indicated by arrowheads (F). Scale bars = 50µm.

(G) GSC lysates were treated with 1 mg/ml RNAase A and then immunoprecipitation was performed with a NANOS2 antibody. Results indicated an RNA-independent interaction between NANOS2 and NEDD4.

(H) Western blots of a co-IP experiment with an anti-NANOS2 antibody and protein lysates from GSCs incubated at 33°C (open circles) and 42°C (filled circles) for 20 min.

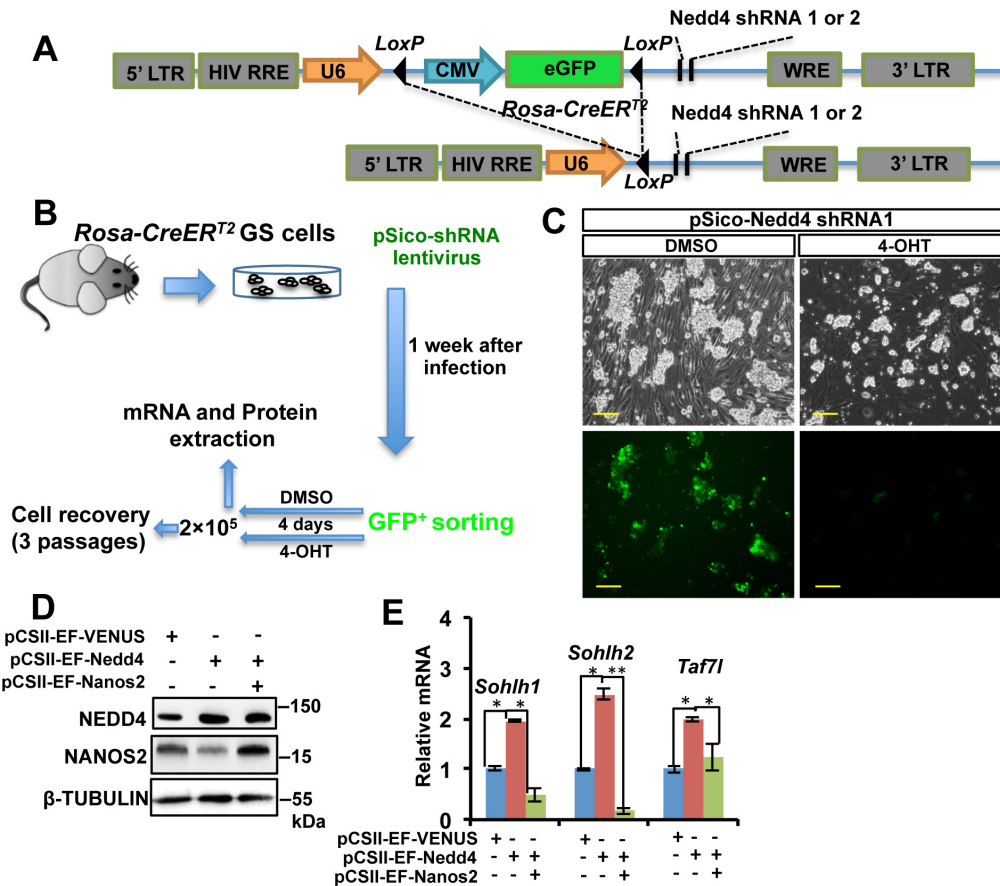

**Supplementary figure 2. Function of NEDD4 in GSCs. Related to Figure 2.**

(A) A lentiviral plasmid construct used for knockdown of NEDD4. *Nedd4* shRNAs (1 and 2) were inserted in pSICO plasmids. After recombination via Cre, *Nedd4* shRNA is induced.

(B) Experimental procedure used for the establishment of *Nedd4* conditional knockdown GSCs (*Nedd4*-cKD GSCs).

(C) Representative pictures of GSCs containing pSico-*Nedd4* shRNA1 treated with DMSO or 4-OHT for 1 week, respectively. Loss of GFP indicates Cre recombination. Cell growth was significantly repressed by the *Nedd4* shRNA induction. Scale bars = 50 $\mu$ m.

(D) GSCs were infected with lentivirus vectors that express VENUS (control), NEDD4 and NANOS2 as indicated for 4 days. WB was performed with lysates.

(E) qRT-PCR analysis of key differentiation genes in (D). GSCs infected with the VENUS virus were set as 1, and the relative levels in other treatments are shown as mean  $\pm$  SD,  $n=3$ . \* $p<0.05$ , \*\* $p<0.01$ ,  $t$  test.

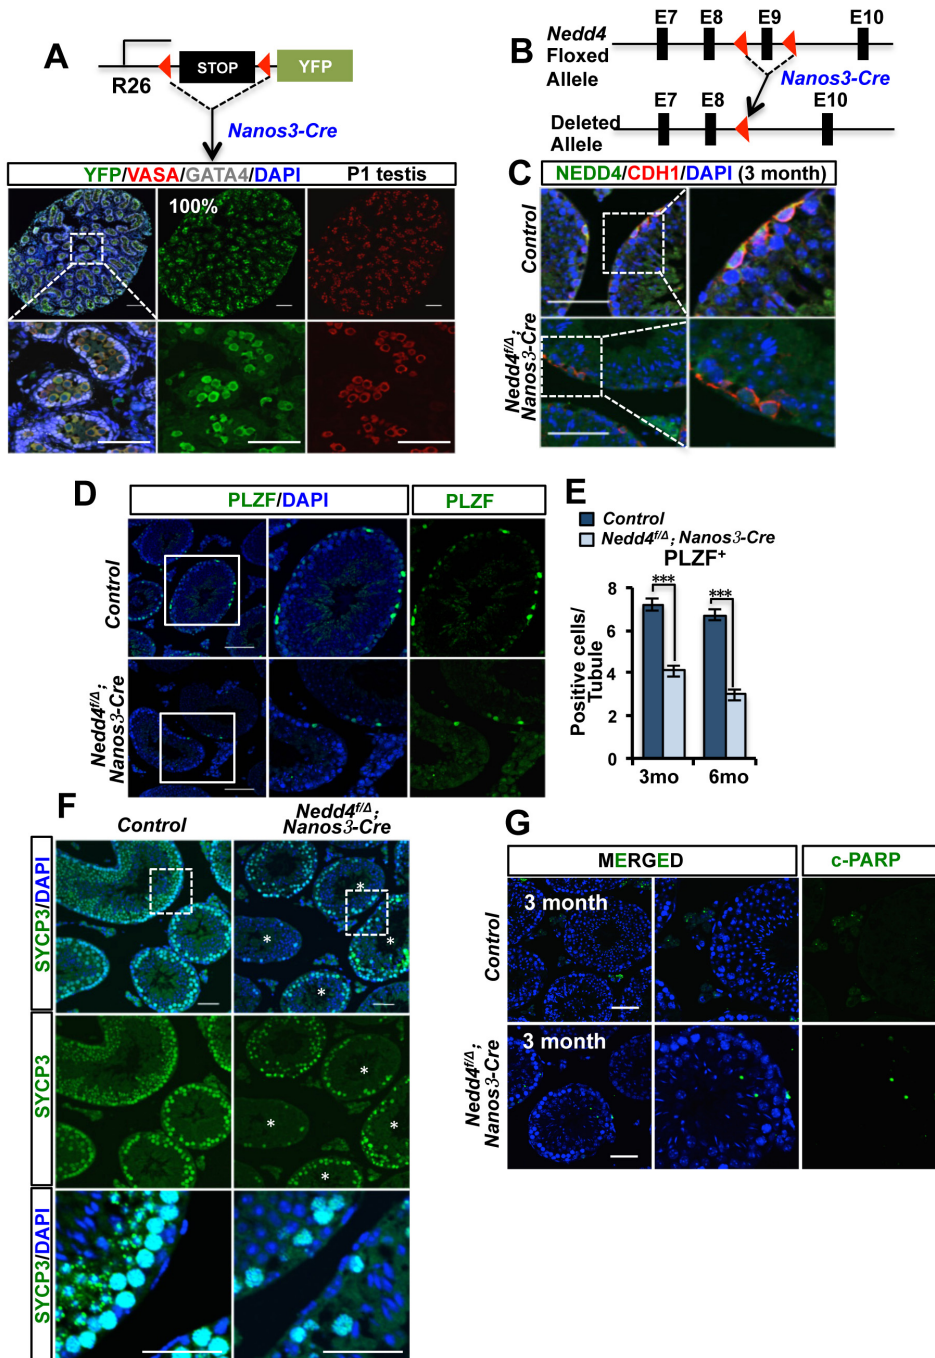

**Supplementary figure 3. Defective spermatogenesis in *Nedd4* cKO mice. Related to Figure 3.**

(A) *Nanos3-Cre* efficiency was examined by crossing with the Rosa-YFP reporter mice. Almost 100% of germ cells show YFP signals demonstrating higher *Nanos3 Cre* efficiency. Scale bar = 50 $\mu$ m.

(B) *Nedd4* cKO strategy. (C) Immunostaining was performed with anti-NEDD4 and anti-CDH1 antibodies in control and *Nedd4* cKO mice at 3 months. Deletion of *Nedd4* was observed in

CDH1<sup>+</sup> SPCs by *Nanos3-Cre*. Scale bar = 50µm.

(D, E) Immunostaining for the SPC marker PLZF showed that PLZF<sup>+</sup> cells were significantly reduced in *Nedd4* cKO testes. \*\*\* $p < 0.001$ , *t* test. Scale bar = 50µm.

(F) Representative staining showed that the SYCP3<sup>+</sup> meiotic cells were reduced in *Nedd4* cKO testis as compared with the control. Asterisks indicate defective tubules. Scale bars = 50µm.

(G) Immunostaining of c-PARP demonstrated no apparent increase of apoptosis in 3-month testes in the absence of *Nedd4*. Scale bars = 50µm.

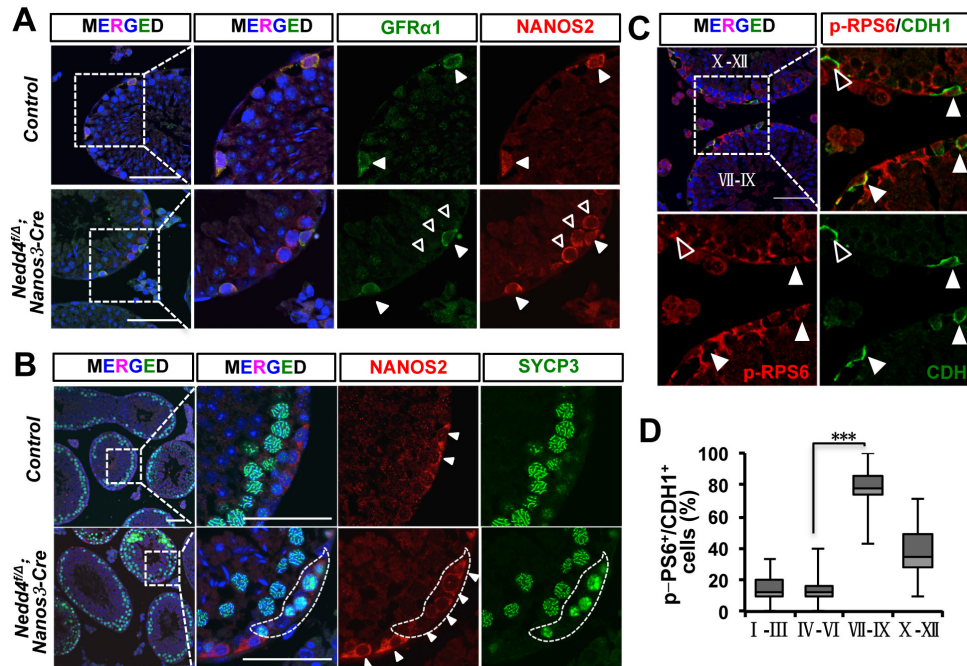

**Supplementary figure 4. Spermatogonial defects in *Nedd4* cKO mice. Related to Figure 4.**

(A) In control testis (upper panel), GFR $\alpha$ 1 (green) and NANOS2 (red) are always co-localized; however, in the *Nedd4* cKO testes, the NANOS2<sup>+</sup> population was detected even in GFR $\alpha$ 1-negative cells (open arrowheads). Scale bars = 50 $\mu$ m.

(B) Representative staining of 3 month old testes showing NANOS2 protein was stabilized even in the early SYCP3<sup>+</sup> meiotic population in *Nedd4* cKO testes as indicated by arrowheads in dotted circles. Scale bar = 50 $\mu$ m.

(C-D) Co-staining of p-RPS6 with CDH1 (B) respectively in 3-month-old WT mouse testes. Open arrowheads indicate p-RPS6-negative spermatogonia. Filled arrowheads indicate p-RPS6-positive spermatogonia. Statistical analysis indicated that most CDH1<sup>+</sup> SPCs were p-RPS6<sup>+</sup> in RA rich stages (C), \*\*\* $p < 0.001$ , *t* test. Scale bar = 50 $\mu$ m.

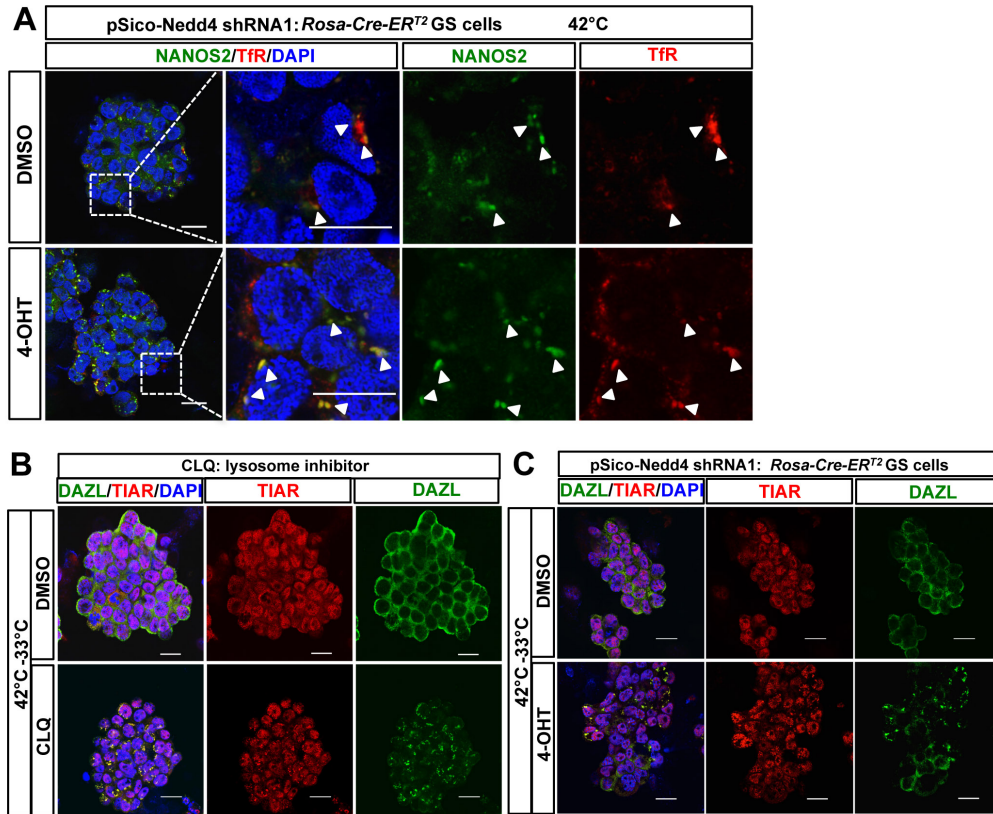

**Supplementary figure 5. NEDD4 is required for SG clearance after heat shock in GSCs. Related to Figure 5.**

(A) Representative pictures showing staining patterns of NANOS2 and TfR (SG marker) in *Nedd4* cKD GSCs treated with DMSO or 4-OHT for 96 hours, then treated with heat for 20 min. NANOS2 was aggregated in SGs in both control and *Nedd4* knockdown cells; many foci also co-localized with TfR, as indicated by arrowheads. Scale bars = 10  $\mu$ m.

(B-C) SG clearance was inhibited in both CLQ-treated (B) and *Nedd4* knockdown GSCs (C). GSCs were placed in heat shock conditions (42°C) for 20 min, and then recovered at 33°C for another 3 hours. Scale bars = 10  $\mu$ m.

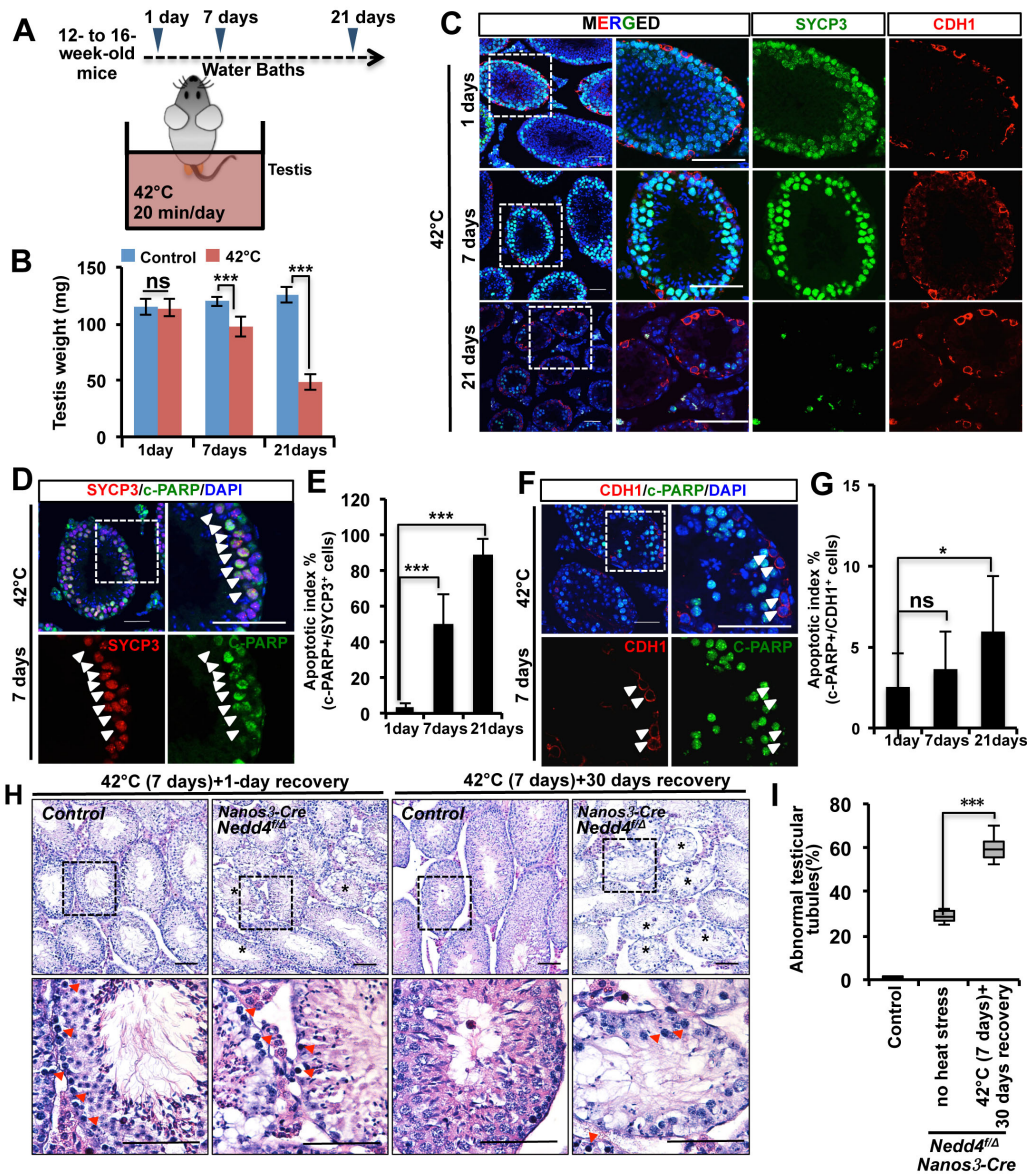

**Supplementary figure 6. Effects of heat stress on mouse spermatogenesis. Related to Figure 6.**

(A) Illustration shows procedures used for examination of time-dependent heat shock effects in WT adult mice.

(B) Statistical analysis demonstrated the testis weight was significantly reduced after 7-day and 21-day constitutive heat shock.  $***p < 0.001$ , *t* test. (C) Representative pictures showing the effects of different heat shock times on SYCP3<sup>+</sup> meiotic cells and CDH1<sup>+</sup> SPCs. SYCP3<sup>+</sup> cells were significantly reduced by heat stress treatment. CDH1<sup>+</sup> SPCs remained stable in the heat stress conditions. Scale bars = 50  $\mu$ m



(D-G) Heat induced apoptosis in CDH1<sup>+</sup> SPCs and SYCP3<sup>+</sup> meiotic cells. After 7-day heat stress, about half of SYCP3<sup>+</sup> meiotic cells were c-PARP positive (D). However, no significant c-PARP<sup>+</sup> cells were induced in CDH1<sup>+</sup> SPCs (F). The proportion of apoptotic cells in the SYCP3<sup>+</sup>(E) and CDH1<sup>+</sup> (G) populations is shown as the mean  $\pm$  SD. \* $p < 0.05$ , \*\*\* $p < 0.001$ , *t* test.

(H) Representative H&E staining showing a greater loss of germ cells in *Nedd4* cKO testes by 30-day recovery from heat stress, whereas the control testes recovered normal spermatogenesis. Red arrowheads indicate apoptotic cells with deep hematoxylin staining. Scale bars = 50  $\mu$ m. (I) Comparison of abnormal testicular tubules (indicated by asterisks) in *Nedd4*-cKO mice after 30-day recovery, tubules with significantly reduced germ cells were counted and shown as mean  $\pm$  SD.. \*\*\* $p < 0.001$ , *t* test.

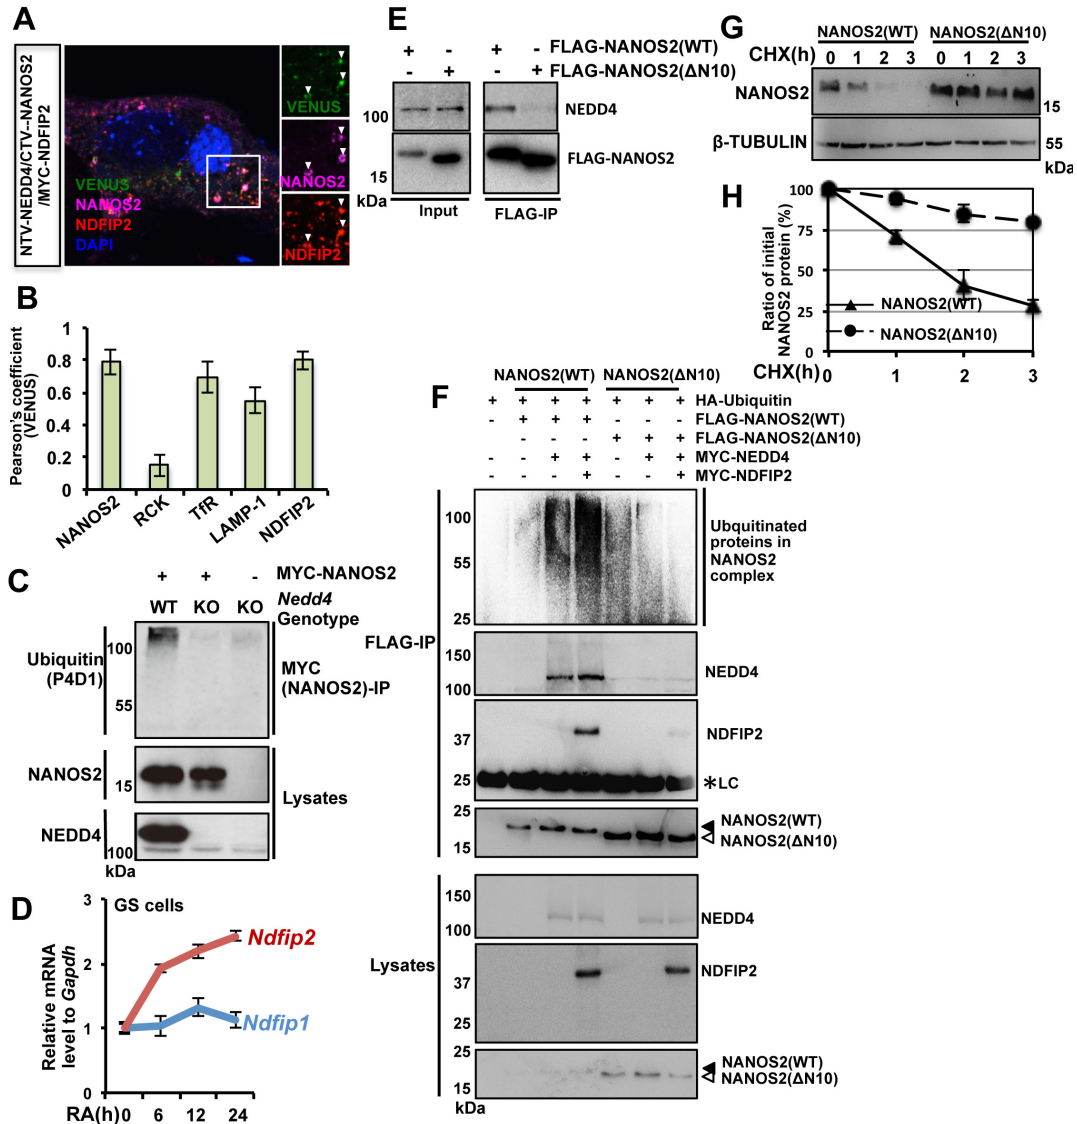

**Supplementary figure 7. N-terminal proline-rich region of NANOS2 is critical for its binding to the NEDD4/NDFIP2 complex and ubiquitination by NEDD4. Related to Figure 7.**

(A) Representative images showing Venus signals from NEDD4/WT-NANOS2 complex co-localized with MYC-tagged NDFIP2.

(B) Co-localization of VENUS (NEDD4 and NANOS2 interaction) with markers shown in Figure 3 (D-H) was characterized by Pearson's coefficient.

(C) MYC-NANOS2 was expressed in both wild-type and *Nedd4*-KO MEF cells. MYC-IP-western analysis showed that the loss of endogenous NEDD4 reduced NANOS2 protein ubiquitination.

(D) RA induced *Ndfip2* expression in GSCs in a time-dependent manner.

(E) FLAG-tagged NANOS2 (WT: wild type; ΔN10: N terminal deletion) and MYC-NEDD4 plasmids were co-transfected in HEK 293T cells, and then FLAG-tagged NANOS2 was immunoprecipitated with the FLAG antibody.

(F) Western blot analysis of 293T cells co-transfected with plasmids expressing HA-tagged ubiquitin, FLAG-tagged NANOS2 (WT or ΔN10), and MYC-tagged *Ndfip2* and NEDD4.

Immunoprecipitation was performed with an anti-FLAG (NANOS2) antibody. WT, wild type NANOS2;  $\Delta$ N10, N-terminal deleted NANOS2.

(G, H) 293T cells were transfected with FLAG-tagged WT or  $\Delta$ N10 NANOS2 (1  $\mu$ g each) for 24 hr, and then CHX (20nM) chase was performed for the indicated time points. Samples were collected for western blotting, and the intensity of FLAG-NANOS2 protein was measured as shown in (H). WT, wild-type NANOS2;  $\Delta$ N10, N-terminal deleted NANOS2.

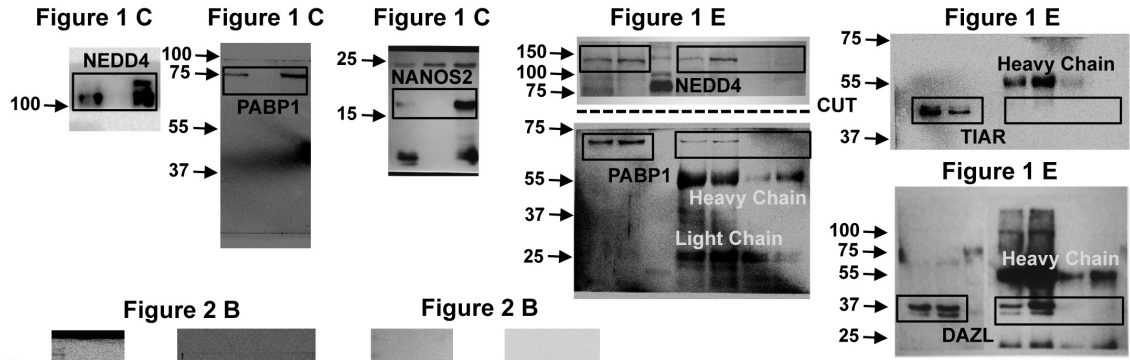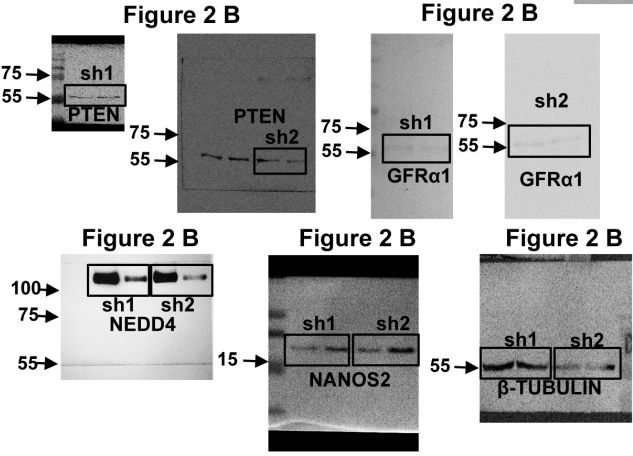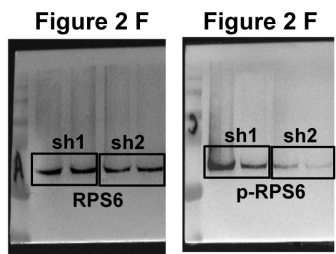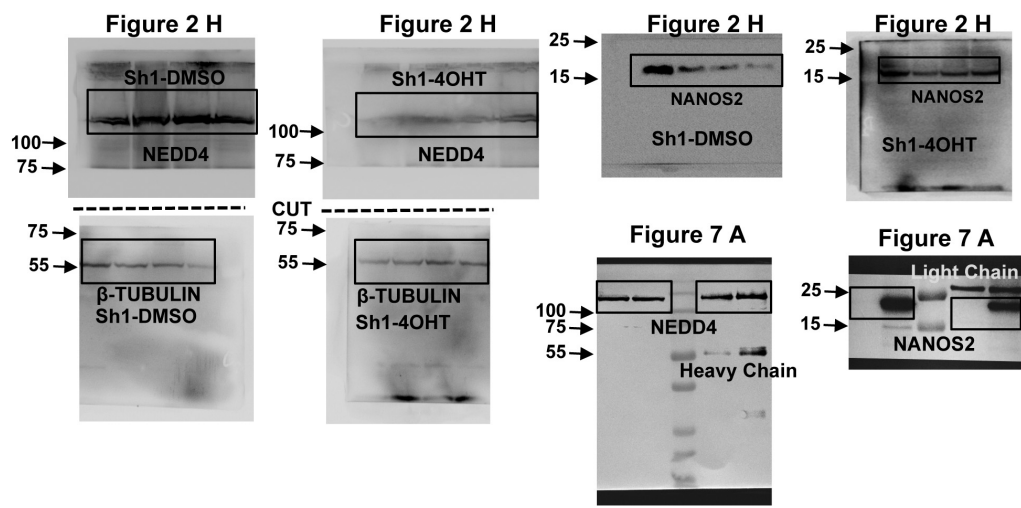

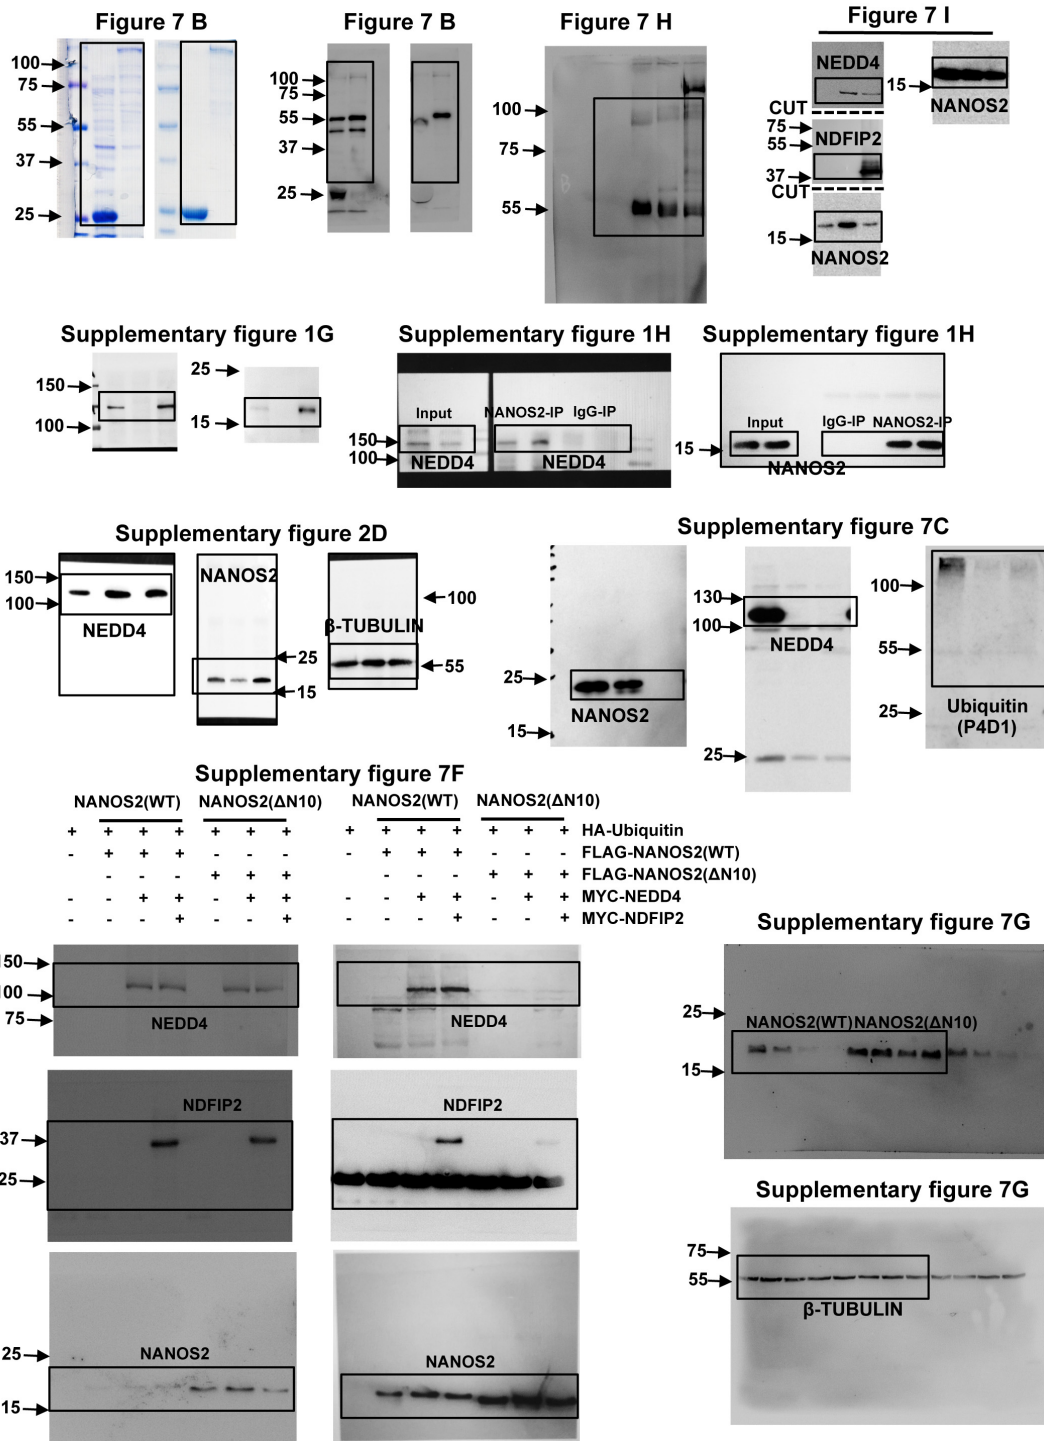

**Supplementary figure 8.** Uncropped scans of the most important western blots images shown in this paper.

## Supplementary Table 1: PCR primers

| Gene name     |         | Sequence (5' to 3')     |
|---------------|---------|-------------------------|
| <i>Nanos2</i> | Forward | TCCCATCCTGAGGCACTATGT   |
|               | Reverse | ACTGCTGTTGAGTGGACAATAC  |
| <i>Nedd4</i>  | Forward | CAGACCAGGCTGAGGAGTTAG   |
|               | Reverse | AGGGCTTGGCCTTTTCCACT    |
| <i>C-kit</i>  | Forward | GCCACGTCTCAGCCATCTG     |
|               | Reverse | GTCGCCAGCTTCAACTATTAACT |
| <i>GFRa1</i>  | Forward | GCACCAAGTACCGCACACT     |
|               | Reverse | GCGGCAGTTGTAGAGAGACTTC  |
| <i>plzf</i>   | Forward | CTGCGGAAAACGGTTCCTG     |
|               | Reverse | GTGCCAGTATGGGTCTGTCT    |
| <i>sohlh1</i> | Forward | AGCCAGACTCCGGTATAGCCA   |
|               | Reverse | GGCATTGAGCACAAGCAGTG    |
| <i>sohlh2</i> | Forward | CTTTGGAGGGAGCAGTGAGAG   |
|               | Reverse | GAATAGGGAGTCAGGGGCCA    |
| <i>taf7l</i>  | Forward | GACAACGTCTCACTGCCTGC    |
|               | Reverse | TACATCTCAAAAGTCACACAAAT |

mRNA level of spermatogonial specific genes were quantified by the above primers used in this study.

## Supplementary Methods

### Antibodies dilution in this study:

#### Immunofluorescence (IF) and immunohistochemistry (IHC)

rabbit polyclonal anti-NANOS2 (1:200), mouse-monoclonal NANOS2(1:50), polyclonal anti-NEDD4 (Abcam, 1:200), monoclonal anti-TIAR (BD Biosciences, 1:200), monoclonal anti-TfR (Novus Biologicals, 1:200), monoclonal anti-LAMP1 (BD Biosciences, 1:200), polyclonal anti-CDH1(1:200), polyclonal anti-PLZF (Santa Cruz Biotechnology, 1:200), polyclonal anti-EIF4E (Cell Signaling Technology, 1:300), polyclonal anti-SYCP3 (Abcam, 1:500), polyclonal anti-GATA1 (Santa Cruz Biotechnology, 1:200), polyclonal anti-GFR $\alpha$ 1 (R&D Systems,1:200), polyclonal anti-DAZL (Abcam, 1:500), polyclonal anti-p-RPS6 (Cell Signaling Technology, 1:300), polyclonal anti-Ki67 (Thermo, 1:300), polyclonal anti-c-PARP (Cell Signaling Technology, 1:300), and monoclonal anti-FLAG (Sigma, M2, 1:1000). Detection of primary antibodies was performed with Alexa 594 or 488 Donkey anti-mouse (Invitrogen, 1:1000), Alexa 488 Donkey anti-Rabbit (Invitrogen, 1:1000), goat anti-Armenian hamster (eBioscience, 1:500), goat anti-Rat Cy5 (Invitrogen, 1:1000), and Donkey anti-goat Cy5 (Invitrogen, 1:1000).

#### Western blot

polyclonal anti-NANOS2 (1:100), polyclonal anti-NEDD4 (Abcam, 1:1000), polyclonal anti-PABP1 (Abcam, 1:1000), anti-TIAR (BD Biosciences, 1:1000), polyclonal anti-RPS6 or anti-pRPS6 (Cell Signaling Technology, 1:1000), monoclonal anti-TIAR (BD Biosciences, 1:1000), polyclonal anti-DAZL (Abcam, 1:1000), polyclonal anti-GFR $\alpha$ 1 (R&D Systems, 1:500), monoclonal anti-FLAG (Sigma, 1:5000), polyclonal anti-PTEN (Abcam, 1:500), polyclonal anti-MYC (Sigma, 1:1000), polyclonal anti-ubiquitin (Santa Cruz Biotechnology, 1:200), polyclonal anti-NDFIP2 (Santa Cruz Biotechnology, 1:200), and monoclonal anti- $\beta$ -TUBULIN (Sigma, 1:2000). Horseradish peroxidase (HRP) conjugated secondary antibodies were from Cell Signaling Technology (1:5000).

## Supplementary References

1. Suzuki, A., Igarashi, K., Aisaki, K., Kanno, J. & Saga, Y. NANOS2 interacts with the CCR4-NOT deadenylation complex and leads to suppression of specific RNAs. *Proceedings of the National Academy of Sciences of the United States of America* **107**, 3594-3599 (2010).
2. Suzuki, A., Saba, R., Miyoshi, K., Morita, Y. & Saga, Y. Interaction between NANOS2 and the CCR4-NOT deadenylation complex is essential for male germ cell development in mouse. *PLoS one* **7**, e33558 (2012).
3. Zhou, Z. *et al.* RNA Binding Protein Nanos2 Organizes Post-transcriptional Buffering System to Retain Primitive State of Mouse Spermatogonial Stem Cells. *Developmental cell* **34**, 96-107 (2015).
4. Hasegawa, K., Namekawa, S.H. & Saga, Y. MEK/ERK signaling directly and indirectly contributes to the cyclical self-renewal of spermatogonial stem cells. *Stem cells* **31**, 2517-2527 (2013).
5. Kanatsu-Shinohara, M. *et al.* Long-term proliferation in culture and germline transmission of mouse male germline stem cells. *Biology of reproduction* **69**, 612-616 (2003).
6. Sada, A., Hasegawa, K., Pin, P.H. & Saga, Y. NANOS2 acts downstream of glial cell line-derived neurotrophic factor signaling to suppress differentiation of spermatogonial stem cells. *Stem cells* **30**, 280-291 (2012).
